# Supplementary material
Source: publisher figshare collection journal article supplement (https://asha.figshare.com/ndownloader/files/35184781)
Supplement: Supplementary file 1 [file 35184781]

**Supplemental Material S1.** Age of datasets from previously published studies on treatment access in speech and language disorders.

| Reported study                | Data source                                                                                   | Year(s) data collected/used |
|-------------------------------|-----------------------------------------------------------------------------------------------|-----------------------------|
| Bishop & Haiyou-Thomas (2008) | Twins Early Development Study (TEDS)                                                          | 1994–1996                   |
| Black et al. (2015)           | National Health Interview Survey (NHIS)                                                       | 2012                        |
| Hebbeler et al. (2007)        | National Early Intervention Longitudinal Study (NEILS)                                        | 1997–1998                   |
| McManus et al. (2013)         | Newborn Lung Project                                                                          | 2003–2004                   |
| Morgan et al. (2012)          | Early Childhood Longitudinal Study–Birth Cohort (ECLS-B)                                      | 2001                        |
| Morgan et al. (2016)          | Early Childhood Longitudinal Study–Birth Cohort (ECLS-B)                                      | 2001                        |
| Robinson & Norton (2019)      | Office of Special Education Programs (OSEP)/National Center for Educational Statistics (NCES) | 2004–2014                   |
| Scarborough et al. (2006)     | National Early Intervention Longitudinal Study (NEILS)                                        | 1997–1998                   |
| Skeat et al. (2014)           | Early Language in Victoria Study (ELVS)                                                       | 2003–2007                   |
| Tomblin et al. (1997)         | EpiSLI                                                                                        | Began ~1995                 |
| Warfield & Gulley (2006)      | Family’s Partner Survey                                                                       | 1998–1999                   |
| Wittke & Spaulding (2018)     | Unknown/not available                                                                         | Unknown                     |
| Zhang & Tomblin (2000)        | EpiSLI                                                                                        | Began ~1995                 |

## References

- Bishop, D. V. M., & Haiyou-Thomas, M. E. (2008). Heritability of specific language impairment depends on diagnostic criteria. *Genes, Brain and Behavior*, 7(3), 365–372. <https://doi.org/10.1111/j.1601-183X.2007.00360.x>
- Black, L. I., Vajratian, A., & Hoffman, H. J. (2015). *Communication disorders and use of intervention services among children aged 3–17 years: United States, 2012*. U.S. Department of Health and Human Services.
- Hebbeler, K., Spiker, D., Bailey, D., Scarborough, A., Mallik, S., Simeonsson, R., Singer, M., & Nelson, L. (2007). *Early intervention for infants and toddlers with disabilities and their families: Participants, services, and outcomes* (p. 116). SRI International.
- McManus, B. M., Robert, S., Albanese, A., Sadek-Badawi, M., & Palta, M. (2013). Predictors of receiving therapy among very low birth weight 2-year olds eligible for Part C early intervention in Wisconsin. *BMC Pediatrics*, 13(1), 106. <https://doi.org/10.1186/1471-2431-13-106>
- Morgan, P. L., Farkas, G., Hillemeier, M. M., & Maczuga, S. (2012). Are minority children disproportionately represented in early intervention and early childhood special education? *Educational Researcher*, 41(9), 339–351. <https://doi.org/10.3102/0013189X12459678>
- Morgan, P. L., Hammer, C. S., Farkas, G., Hillemeier, M. M., Maczuga, S., Cook, M., & Morano, S. (2016). Who receives speech/language services by 5 years of age in the United States? *American Journal of Speech-Language Pathology*, 25(2), 183–199. [https://doi.org/10.1044/2015\\_AJSLP-14-0201](https://doi.org/10.1044/2015_AJSLP-14-0201)
- Robinson, G. C., & Norton, P. C. (2019). A decade of disproportionality: A state-level analysis of African American students enrolled in the primary disability category of speech or language impairment. *Language, Speech, and Hearing Services in Schools*, 50(2), 267–282. [https://doi.org/10.1044/2018\\_LSHSS-17-0149](https://doi.org/10.1044/2018_LSHSS-17-0149)
- Scarborough, A. A., Hebbeler, K. M., & Spiker, D. (2006). Eligibility characteristics of infants and toddlers entering early intervention services in the United States. *Journal of Policy and Practice in Intellectual Disabilities*, 3(1), 57–64. <https://doi.org/10.1111/j.1741-1130.2006.00053.x>

- Skeat, J., Wake, M., Ukoumunne, O. C., Eadie, P., Bretherton, L., & Reilly, S. (2014). Who gets help for pre-school communication problems? Data from a prospective community study. *Child: Care, Health and Development*, 40(2), 215–222. <https://doi.org/10.1111/cch.12032>
- Tomblin, J. B., Records, N. L., Buckwalter, P., Zhang, X., Smith, E., & O'Brien, M. (1997). Prevalence of specific language impairment in kindergarten children. *Journal of Speech, Language, and Hearing Research*, 40(6), 1245–1260. <https://doi.org/10.1044/jslhr.4006.1245>
- Warfield, M. E., & Gulley, S. (2006). Unmet need and problems accessing specialty medical and related services among children with special health care needs. *Maternal and Child Health Journal*, 10(2), 201–216. <https://doi.org/10.1007/s10995-005-0041-3>
- Wittke, K., & Spaulding, T. J. (2018). Which preschool children with specific language impairment receive language intervention? *Language, Speech, and Hearing Services in Schools*, 49(1), 59–71. [https://doi.org/10.1044/2017\\_LSHSS-17-0024](https://doi.org/10.1044/2017_LSHSS-17-0024)
- Zhang, X., & Tomblin, J. B. (2000). The association of intervention receipt with speech-language profiles and social-demographic variables. *American Journal of Speech-Language Pathology*, 9(4), 345–357. <https://doi.org/10.1044/1058-0360.0904.345>
